# Supplementary material
Source: Springer Nature journal article supplement (https://www.springermedizin.de/resource/supplementary/13045_2014_400_MOESM11_ESM.pdf/9661292)

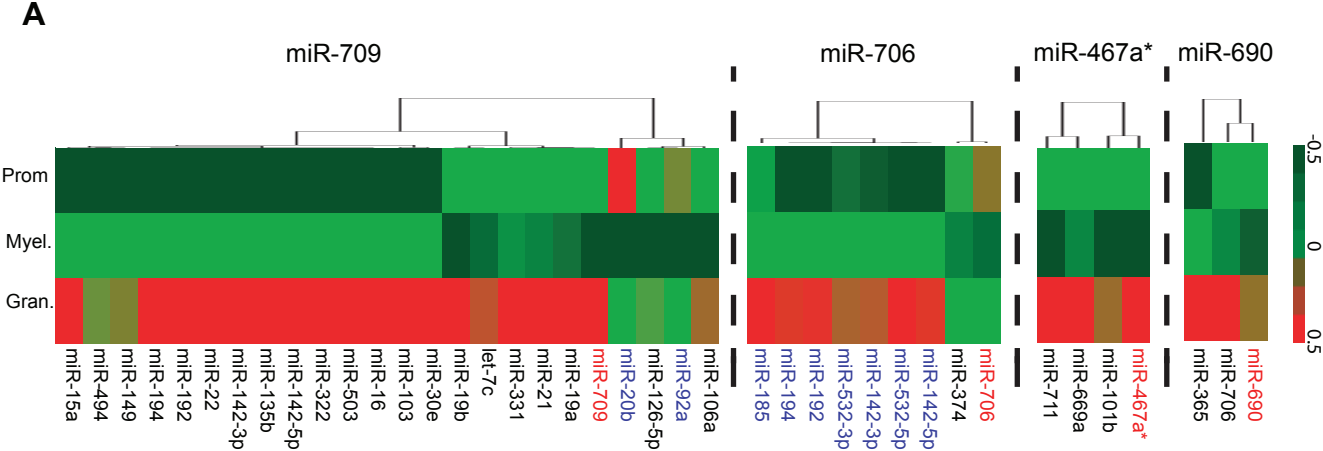

**B**

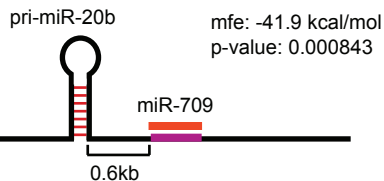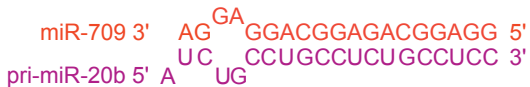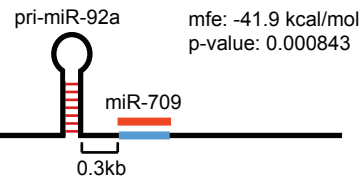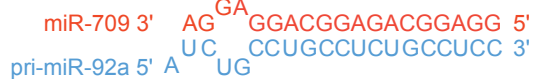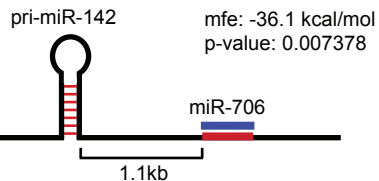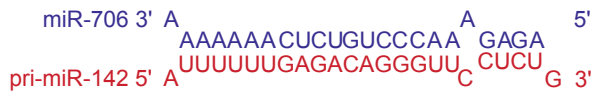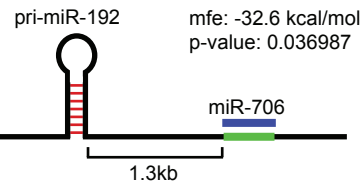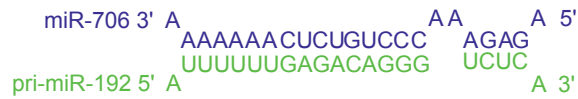

Supplement: MOESM11 [file 9661292]
